# Supplementary material
Source: Springer Nature journal article supplement (https://www.springermedizin.de/resource/supplementary/12883_2013_847_MOESM4_ESM.pdf/9455972)

## EQ-5D: Anxious or depressed

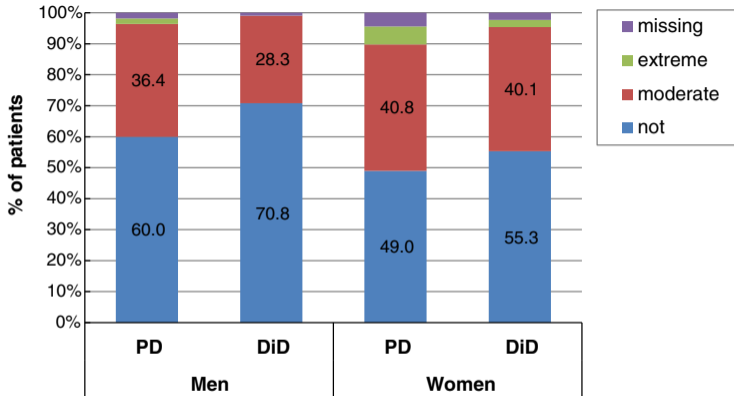

Number of patients:            men    women

PD            55        206

DiD          113      217

Supplement: MOESM4 [file 9455972]
